# Supplementary material for: Free Radical–Associated Gene Signature Predicts Survival in Sepsis Patients
Source: MDPI journal article supplement (doi:10.3390/ijms25084574), 2024-04-22
Supplement: s1 [file s1]

Supplemental Table S2: Sepsis-survival related genes.

| ROS-related Gene List |                                                                      |            |          |
|-----------------------|----------------------------------------------------------------------|------------|----------|
| Gene Symbol           | Gene Name                                                            | logFC      | adj-p    |
| FGFBP2                | fibroblast growth factor binding protein 2                           | 2.21409787 | 6.96E-24 |
| TNFRSF25              | TNF receptor superfamily member 25                                   | 2.16760952 | 3.51E-37 |
| CD5                   | CD5 molecule                                                         | 2.13358987 | 2.40E-42 |
| S1PR5                 | sphingosine-1-phosphate receptor 5                                   | 2.11873122 | 4.53E-30 |
| C6orf190              | thymocyte selection associated                                       | 2.09687165 | 4.61E-42 |
| ZAP70                 | zeta chain of T cell receptor associated protein kinase 70           | 2.09231594 | 4.31E-39 |
| PVRIG                 | PVR related immunoglobulin domain containing                         | 2.03717016 | 4.91E-42 |
| BCL11B                | BCL11 transcription factor B                                         | 2.02797437 | 2.19E-34 |
| EOMES                 | eomesodermin                                                         | 2.00470494 | 3.15E-29 |
| CD6                   | CD6 molecule                                                         | 1.99607843 | 5.24E-44 |
| CD27                  | CD27 molecule                                                        | 1.99203512 | 1.04E-29 |
| FCER1A                | Fc epsilon receptor 1a                                               | 1.97530166 | 1.95E-20 |
| TCEA3                 | transcription elongation factor A3                                   | 1.9710649  | 1.42E-30 |
| SBK1                  | SH3 domain binding kinase 1                                          | 1.93412746 | 3.02E-43 |
| SKAP1                 | src kinase associated phosphoprotein 1                               | 1.92154118 | 6.00E-43 |
| UBASH3A               | ubiquitin associated and SH3 domain containing A                     | 1.91069272 | 5.19E-35 |
| FLT3LG                | fms related receptor tyrosine kinase 3 ligand                        | 1.90064791 | 1.17E-38 |
| GZMH                  | granzyme H                                                           | 1.89889382 | 9.66E-22 |
| CD3E                  | CD3 epsilon subunit of T-cell receptor complex                       | 1.8940005  | 1.13E-34 |
| CD4                   | CD4 molecule                                                         | 1.89026653 | 3.37E-34 |
| CCR3                  | C-C motif chemokine receptor 3                                       | 1.86615156 | 3.08E-15 |
| RORA                  | RAR related orphan receptor A                                        | 1.8517576  | 4.51E-43 |
| CD160                 | CD160 molecule                                                       | 1.8340921  | 4.58E-24 |
| D4S234E               | neuronal vesicle trafficking associated 1                            | 1.83339124 | 1.98E-29 |
| FCGBP                 | Fc gamma binding protein                                             | 1.82061919 | 3.09E-29 |
| TRAF5                 | TNF receptor associated factor 5                                     | 1.77965484 | 1.69E-38 |
| SLC25A38              | solute carrier family 25 member 38                                   | 1.77107373 | 3.77E-50 |
| GZMK                  | granzyme K                                                           | 1.77018351 | 2.07E-28 |
| RASGRP1               | RAS guanyl releasing protein 1                                       | 1.76774559 | 6.69E-42 |
| GPR162                | G protein-coupled receptor 162                                       | 1.7519198  | 2.22E-22 |
| FAM102A               | estrogen-induced osteoclastogenesis regulator 1                      | 1.75047508 | 1.44E-38 |
| GNLY                  | granulysin                                                           | 1.73917668 | 7.39E-21 |
| CD96                  | CD96 molecule                                                        | 1.73169549 | 1.24E-36 |
| P2RY10                | P2Y receptor family member 10                                        | 1.72118381 | 9.16E-34 |
| HDC                   | histidine decarboxylase                                              | 1.71824419 | 6.62E-18 |
| CD3D                  | CD3 delta subunit of T-cell receptor complex                         | 1.71499399 | 1.35E-35 |
| GDPD5                 | glycerophosphodiester phosphodiesterase domain containing 5          | 1.71327959 | 3.92E-38 |
| MCOLN2                | mucolipin TRP cation channel 2                                       | 1.7024545  | 3.14E-31 |
| SLC25A23              | solute carrier family 25 member 23                                   | 1.70105034 | 1.82E-37 |
| PECI                  | enoyl-CoA delta isomerase 2                                          | 1.69985795 | 1.86E-42 |
| TLR7                  | toll like receptor 7                                                 | 1.69089876 | 1.31E-26 |
| ATP8B2                | ATPase phospholipid transporting 8B2                                 | 1.68652085 | 6.69E-36 |
| TSEN54                | tRNA splicing endonuclease subunit 54                                | 1.68558135 | 2.03E-46 |
| CLIC3                 | chloride intracellular channel 3                                     | 1.67655218 | 3.11E-20 |
| ZNHIT6                | zinc finger HIT-type containing 6                                    | 1.67072237 | 7.41E-50 |
| OAF                   | out at first homolog                                                 | 1.66801079 | 1.18E-32 |
| MME                   | membrane metalloendopeptidase                                        | 1.66223671 | 6.95E-15 |
| HLA-DMB               | major histocompatibility complex, class II, DM beta                  | 1.66222371 | 2.70E-33 |
| NOV                   | cellular communication network factor 3                              | 1.65984408 | 1.73E-22 |
| GZMA                  | granzyme A                                                           | 1.65367098 | 2.41E-25 |
| KLHL3                 | kelch like family member 3                                           | 1.6531521  | 9.13E-38 |
| C16orf30              | transmembrane protein 204                                            | 1.65084835 | 1.13E-33 |
| LGALS2                | galectin 2                                                           | 1.64687982 | 3.98E-18 |
| SULF2                 | sulfatase 2                                                          | 1.64220916 | 1.89E-25 |
| FLJ14213              | proline rich 5 like                                                  | 1.63245609 | 4.40E-26 |
| TGFBR3                | transforming growth factor beta receptor 3                           | 1.62461497 | 1.12E-36 |
| PRKDC                 | protein kinase, DNA-activated, catalytic subunit                     | 1.62338941 | 1.76E-20 |
| ITK                   | IL2 inducible T cell kinase                                          | 1.61544488 | 1.66E-34 |
| NOC3L                 | NOC3 like DNA replication regulator                                  | 1.61306989 | 1.25E-34 |
| RSAD1                 | radical S-adenosyl methionine domain containing 1                    | 1.61201737 | 6.49E-47 |
| CD247                 | CD247 molecule                                                       | 1.60967392 | 4.75E-35 |
| CD8A                  | CD8 subunit alpha                                                    | 1.59870455 | 4.08E-23 |
| TBC1D9                | TBC1 domain family member 9                                          | 1.59091886 | 1.02E-24 |
| PTPRCAP               | protein tyrosine phosphatase receptor type C associated protein      | 1.58839282 | 3.43E-35 |
| NELF                  | NMDA receptor synaptonuclear signaling and neuronal migration factor | 1.58099767 | 7.64E-39 |
| TTC27                 | tetratricopeptide repeat domain 27                                   | 1.57947471 | 5.36E-43 |
| TARBP1                | TAR (HIV-1) RNA binding protein 1                                    | 1.57550461 | 2.43E-38 |
| KLRG1                 | killer cell lectin like receptor G1                                  | 1.57258893 | 1.31E-30 |
| MEF2C                 | myocyte enhancer factor 2C                                           | 1.5695608  | 6.26E-32 |
| MBNL2                 | muscleblind like splicing regulator 2                                | 1.56769051 | 2.87E-33 |
| TCF3                  | transcription factor 3                                               | 1.56242825 | 2.43E-39 |
| IL7R                  | interleukin 7 receptor                                               | 1.55882094 | 5.06E-32 |
| C2orf89               | TraB domain containing 2A                                            | 1.55869534 | 3.48E-30 |
