# Supplementary material for: Free Radical–Associated Gene Signature Predicts Survival in Sepsis Patients
Source: MDPI journal article supplement (doi:10.3390/ijms25084574), 2024-04-22
Supplement: s1 [file s1]

Supplemental Table S1: ROS-related gene list.

| ROS-related Gene List |                                                                    |
|-----------------------|--------------------------------------------------------------------|
| Gene Symbol           | Gene Name                                                          |
| ALB                   | Albumin                                                            |
| ALOX12                | Arachidonate 12-lipoxygenase                                       |
| APOE                  | Apolipoprotein E                                                   |
| ATOX1                 | ATX1 antioxidant protein 1 homolog                                 |
| BAG1                  | BCL2-associated athanogene                                         |
| BCL2                  | B-cell CLL/lymphoma 2                                              |
| BNIP3                 | BCL2/adenovirus E1B 19kDa interacting protein 3                    |
| CALR                  | Calreticulin                                                       |
| CANX                  | Calnexin                                                           |
| CAT                   | Catalase                                                           |
| CCL5                  | Chemokine (C-C motif) ligand 5                                     |
| CCS                   | Copper chaperone for superoxide dismutase                          |
| CCT2                  | Chaperonin containing TCP1, subunit 2 (beta)                       |
| CCT3                  | Chaperonin containing TCP1, subunit 3 (gamma)                      |
| CCT4                  | Chaperonin containing TCP1, subunit 4 (delta)                      |
| CCT5                  | Chaperonin containing TCP1, subunit 5 (epsilon)                    |
| CCT7                  | Chaperonin containing TCP1, subunit 7 (eta)                        |
| CCT8                  | Chaperonin containing TCP1, subunit 8 (theta)                      |
| CES1                  | Carboxylesterase 1 (monocyte/macrophage serine esterase 1)         |
| CSDE1                 | Cold shock domain containing E1, RNA-binding                       |
| CYBA                  | Cytochrome b-245, alpha polypeptide                                |
| CYBB                  | Cytochrome b-245, beta polypeptide (chronic granulomatous disease) |
| CYP11A1               | Cytochrome P450, family 11, subfamily A, polypeptide 1             |
| CYP11B2               | Cytochrome P450, family 11, subfamily B, polypeptide 2             |
| CYP1A1                | Cytochrome P450, family 1, subfamily A, polypeptide 1              |
| CYP1B1                | Cytochrome P450, family 1, subfamily B, polypeptide 1              |
| CYP2C19               | Cytochrome P450, family 2, subfamily C, polypeptide 19             |
| CYP2D6                | Cytochrome P450, family 2, subfamily D, polypeptide 6              |
| CYP2F1                | Cytochrome P450, family 2, subfamily F, polypeptide 1              |
| DHCR24                | 24-dehydrocholesterol reductase                                    |
| DNAJA1                | DnaJ (Hsp40) homolog, subfamily A, member 1                        |
| DNAJA2                | DnaJ (Hsp40) homolog, subfamily A, member 2                        |
| DNAJA3                | DnaJ (Hsp40) homolog, subfamily A, member 3                        |
| DNAJA4                | DnaJ (Hsp40) homolog, subfamily A, member 4                        |
| DNAJB1                | DnaJ (Hsp40) homolog, subfamily B, member 1                        |
| DNAJB11               | DnaJ (Hsp40) homolog, subfamily B, member 11                       |
| DNAJB12               | DnaJ (Hsp40) homolog, subfamily B, member 12                       |

|        |                                                      |
|--------|------------------------------------------------------|
| DNAJB2 | DnaJ (Hsp40) homolog, subfamily B, member 2          |
| DNAJB4 | DnaJ (Hsp40) homolog, subfamily B, member 4          |
| DNAJB5 | DnaJ (Hsp40) homolog, subfamily B, member 5          |
| DNAJB6 | DnaJ (Hsp40) homolog, subfamily B, member 6          |
| DNAJB9 | DnaJ (Hsp40) homolog, subfamily B, member 9          |
| DNAJC1 | DnaJ (Hsp40) homolog, subfamily C, member 1          |
| DNAJC4 | DnaJ (Hsp40) homolog, subfamily C, member 4          |
| DNAJC5 | DnaJ (Hsp40) homolog, subfamily C, member 5          |
| DNAJC7 | DnaJ (Hsp40) homolog, subfamily C, member 7          |
| DNAJC8 | DnaJ (Hsp40) homolog, subfamily C, member 8          |
| DNAJC9 | DnaJ (Hsp40) homolog, subfamily C, member 9          |
| DUOX1  | Dual oxidase 1                                       |
| DUSP1  | Dual specificity phosphatase 1                       |
| EPHX2  | Epoxide hydrolase 2                                  |
| EPX    | Eosinophil peroxidase                                |
| FMO4   | Flavin containing monooxygenase 4                    |
| FMO5   | Flavin containing monooxygenase 5                    |
| FOS    | v-fos FBJ murine osteosarcoma viral oncogene homolog |
| FOXM1  | Forkhead box M1                                      |
| FTH1   | Ferritin, heavy polypeptide 1                        |
| GCLC   | Glutamate-cysteine ligase, catalytic subunit         |
| GCLM   | Glutamate-cysteine ligase, modifier subunit          |
| GLRX2  | Glutaredoxin 2                                       |
| GPR156 | G protein-coupled receptor 156                       |
| GPX1   | Glutathione peroxidase 1                             |
| GPX3   | Glutathione peroxidase 3                             |
| GPX4   | Glutathione peroxidase 4                             |
| GPX6   | Glutathione peroxidase 6                             |
| GPX7   | Glutathione peroxidase 7                             |
| GSR    | Glutathione reductase                                |
| GSS    | Glutathione synthetase                               |
| GSTA5  | Glutathione S-transferase A5                         |
| GSTP1  | Glutathione S-transferase pi                         |
| GSTZ1  | Glutathione transferase zeta 1                       |
| GTF2I  | General transcription factor II, i                   |
| HIF1A  | Hypoxia-inducible factor 1, alpha subunit            |
| HIP2   | Huntingtin interacting protein 2                     |
| HMOX1  | Heme oxygenase (decycling) 1                         |
| HMOX2  | Heme oxygenase (decycling) 2                         |
| HOPX   | HOP homeobox                                         |
| HSPA1A | Heat shock 70kDa protein 1A                          |
| HSPA1L | Heat shock 70kDa protein 1-like                      |
| HSPA2  | Heat shock 70kDa protein 2                           |
| HSPA4  | Heat shock 70kDa protein 4                           |
| HSPA5  | Heat shock 70kDa protein 5                           |
| HSPA8  | Heat shock 70kDa protein 8                           |
| HSPA9  | Heat shock 70kDa protein 9                           |

|          |                                                                       |
|----------|-----------------------------------------------------------------------|
| HSPB1    | Heat shock 27kDa protein 1                                            |
| HSPB2    | Heat shock 27kDa protein 2                                            |
| HSPD1    | Heat shock 60kDa protein 1                                            |
| HSPE1    | Heat shock 10kDa protein 1                                            |
| JUNB     | Jun B proto-oncogene                                                  |
| KEAP1    | Kelch-like ECH-associated protein 1                                   |
| KRT1     | Keratin 1                                                             |
| MB       | Myoglobin                                                             |
| MGST3    | Microsomal glutathione S-transferase 3                                |
| MPO      | Myeloperoxidase                                                       |
| MPV17    | MpV17 mitochondrial inner membrane protein                            |
| MSRA     | Methionine sulfoxide reductase A                                      |
| MTLÂ 5   | Metallothionein-like 5                                                |
| NCF1     | Neutrophil cytosolic factor 1                                         |
| NCF2     | Neutrophil cytosolic factor 2                                         |
| NOX4     | NADPH oxidase 4                                                       |
| NQO1     | NAD(P)H dehydrogenase, quinone 1                                      |
| NUDT1    | Nudix (nucleoside diphosphate linked moiety X)-type motif 1           |
| OXR1     | Oxidation resistance 1                                                |
| OXSR1    | Oxidative-stress responsive 1                                         |
| PDLIM1   | PDZ and LIM domain 1 (elfin)                                          |
| PNKP     | Polynucleotide kinase 3â€²-phosphatase                                |
| PON1     | Paraoxonase 1                                                         |
| PPID     | Peptidylprolyl isomerase D (cyclophilin D)                            |
| PRDX1    | Peroxiredoxin 1                                                       |
| PRDX2    | Peroxiredoxin 2                                                       |
| PRDX3    | Peroxiredoxin 3                                                       |
| PRDX4    | Peroxiredoxin 4                                                       |
| PRDX5    | Peroxiredoxin 5                                                       |
| PRDX6    | Peroxiredoxin 6                                                       |
| PREX1    | Phosphatidylinositol 3,4,5-trisphosphate-dependent RAC exchanger 1    |
| PRG3     | Proteoglycan 3                                                        |
| PRNP     | Prion protein (p27â€³30)                                              |
| PTGS1    | Prostaglandin-endoperoxide synthase 1                                 |
| PTGS2    | Prostaglandin-endoperoxide synthase 2                                 |
| RNF7     | Ring finger protein 7                                                 |
| SCARA3   | Scavenger receptor class A, member 3                                  |
| SELS     | Selenoprotein S                                                       |
| SERPINH1 | Serpin peptidase inhibitor, clade H (heat shock protein 47), member 1 |
| SFTPD    | Surfactant, pulmonary-associated protein D                            |
| SGK2     | Serum/glucocorticoid regulated kinase 2                               |
| SIRT2    | Sirtuin 2                                                             |
| SOD1     | Superoxide dismutase 1                                                |
| SOD2     | Superoxide dismutase 2                                                |
| SQSTM1   | Sequestosome 1                                                        |
| SRXN1    | Sulfiredoxin 1                                                        |
| ST13     | Suppression of tumorigenicity 13                                      |
| STK25    | Serine/threonine kinase 25                                            |
| TCP1     | T-complex 1                                                           |
| TTN      | Titin                                                                 |
| TXNRD1   | Thioredoxin reductase 1                                               |
| TXNRD2   | Thioredoxin reductase 2                                               |
| UCP2     | Uncoupling protein 2                                                  |
